# Supplementary material for: Synthesis of a truncated bi-antennary complex-type N-glycan oxazoline; glycosylation catalysed by the endohexosaminidases Endo A and Endo M
Source: Royal Society of Chemistry journal article supplement (doi:10.1039/b907273j), 2009-01-01

## Supporting Information

### **Synthesis of a truncated bi-antennary complex-type *N*-glycan oxazoline; glycosylation catalysed by the endohexosaminidases Endo A and Endo M**

Thomas B. Parsons,<sup>a</sup> James W. B. Moir,<sup>b</sup> and Antony J. Fairbanks<sup>c,\*</sup>

<sup>a</sup> *Department of Chemistry, Chemistry Research Laboratory, University of Oxford,  
Mansfield Road, Oxford, OX1 3TA, UK*

<sup>b</sup> *Department of Biology, University of York, YO10 5YW, UK*

<sup>c</sup> *Department of Chemistry, University of Canterbury, Private Bag 4800, Christchurch,  
New Zealand*

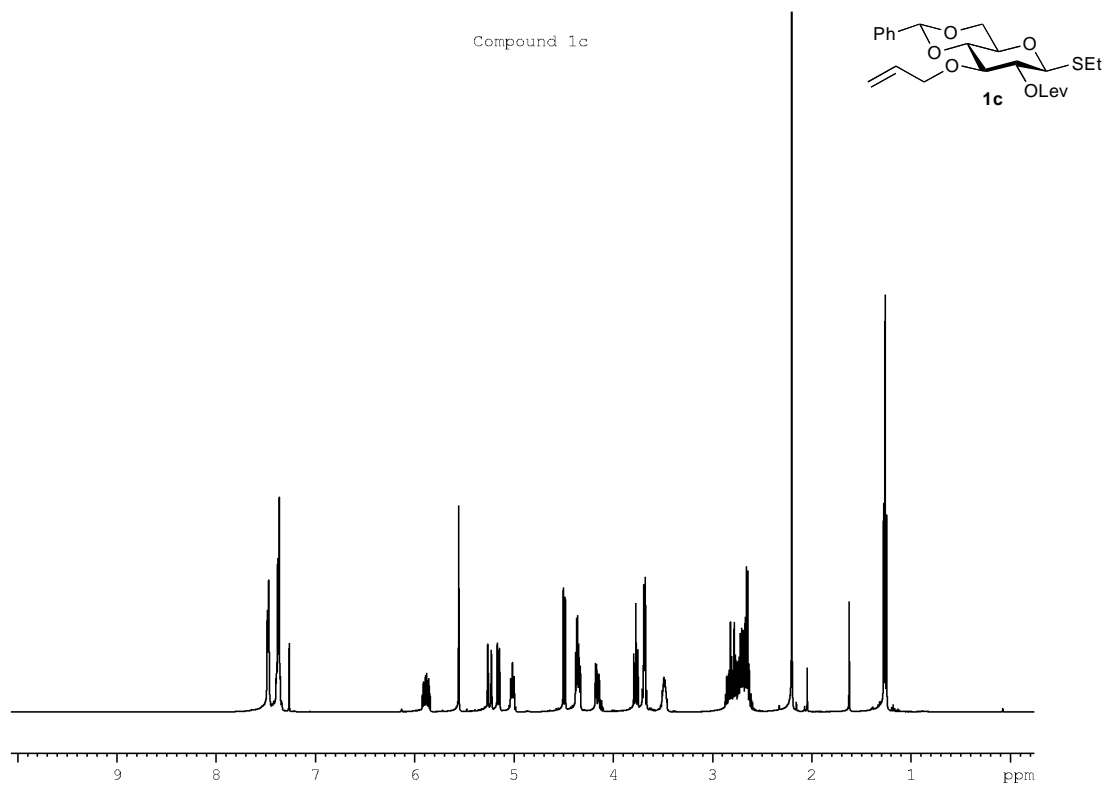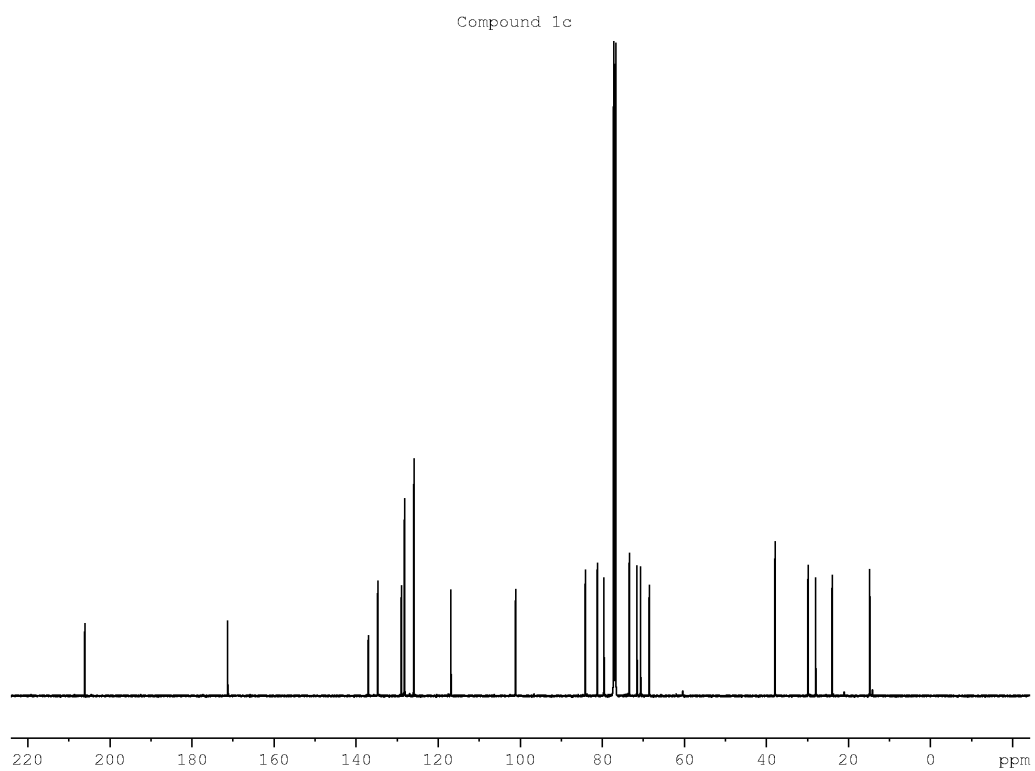

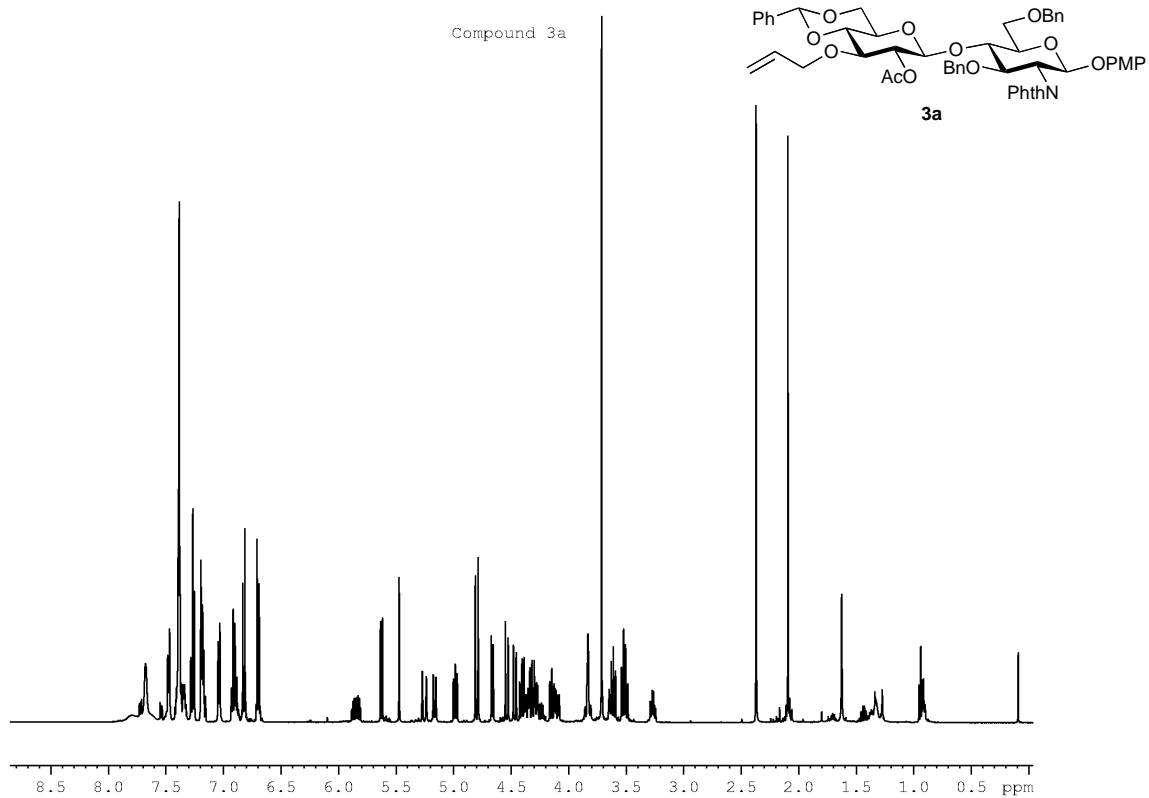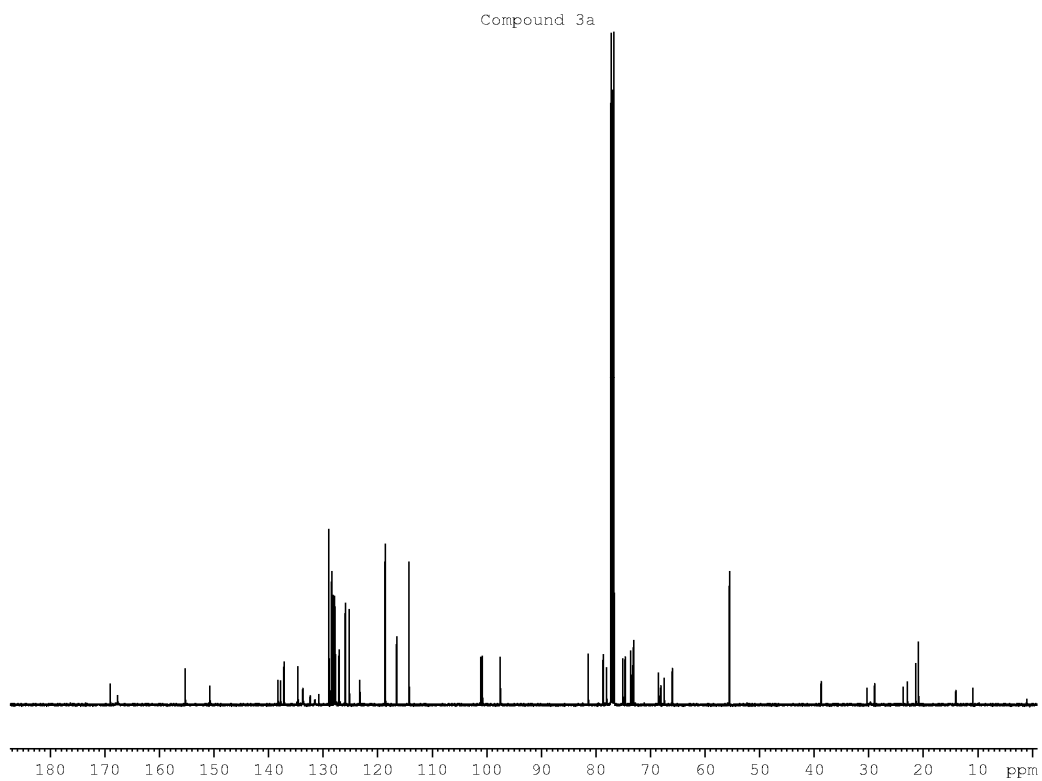

Compound 3b

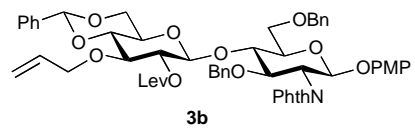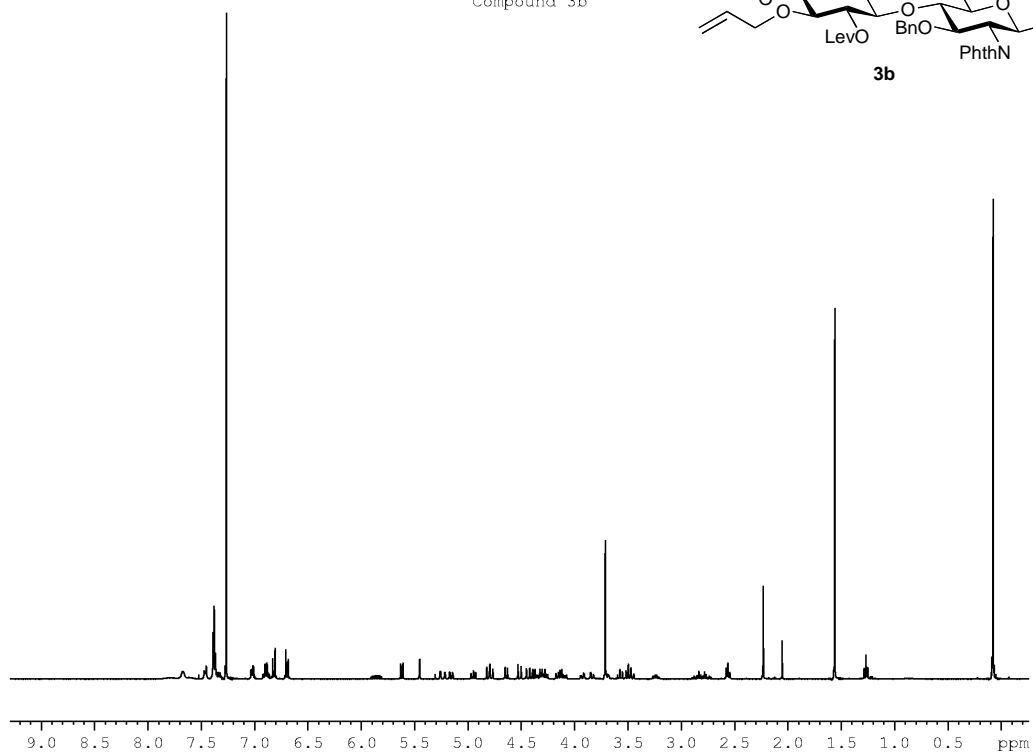

Compound 3b

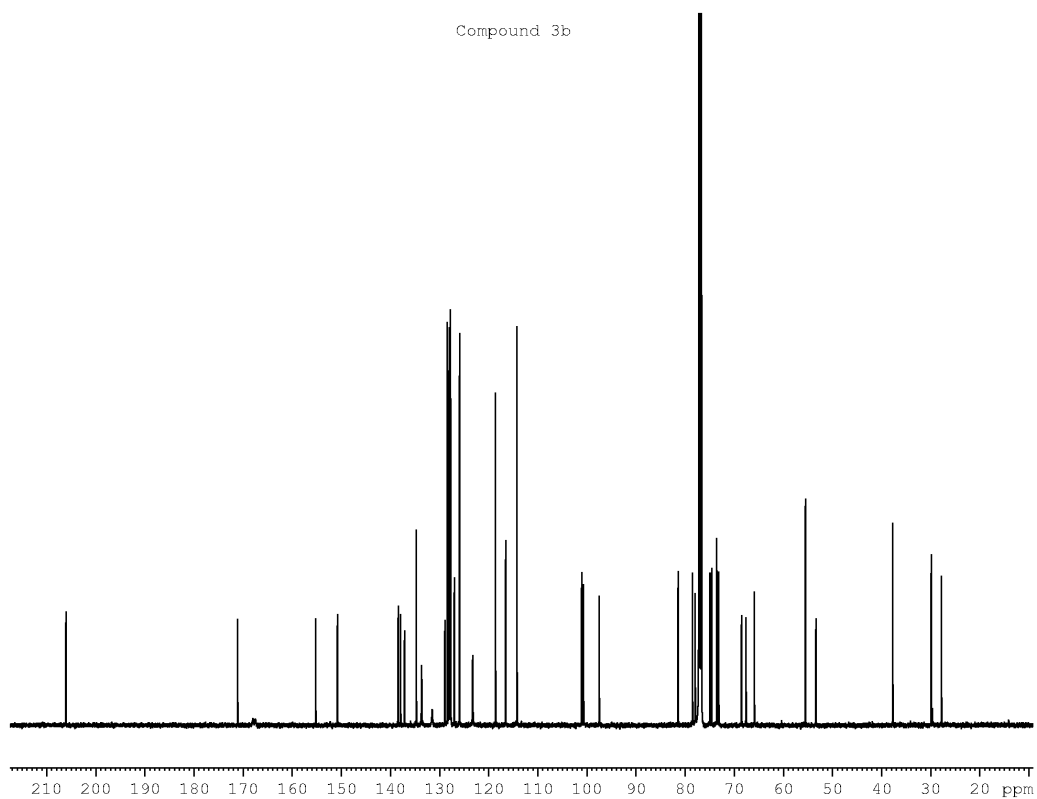

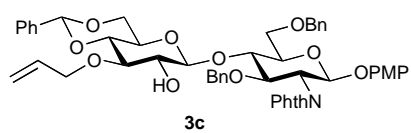

Compound 3c

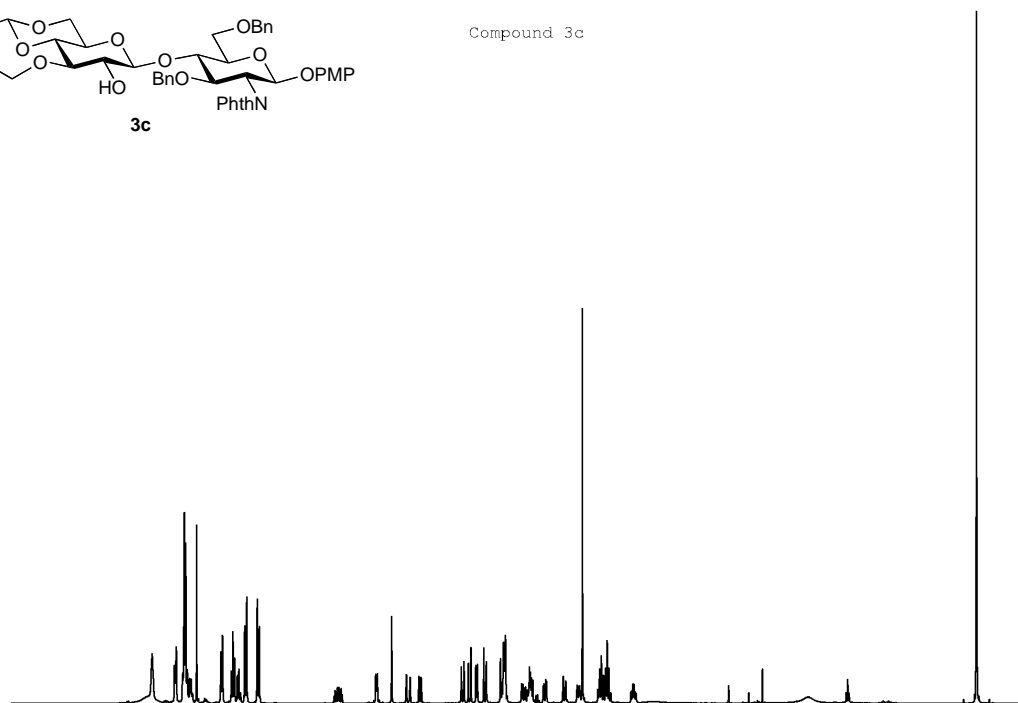

Compound 3c

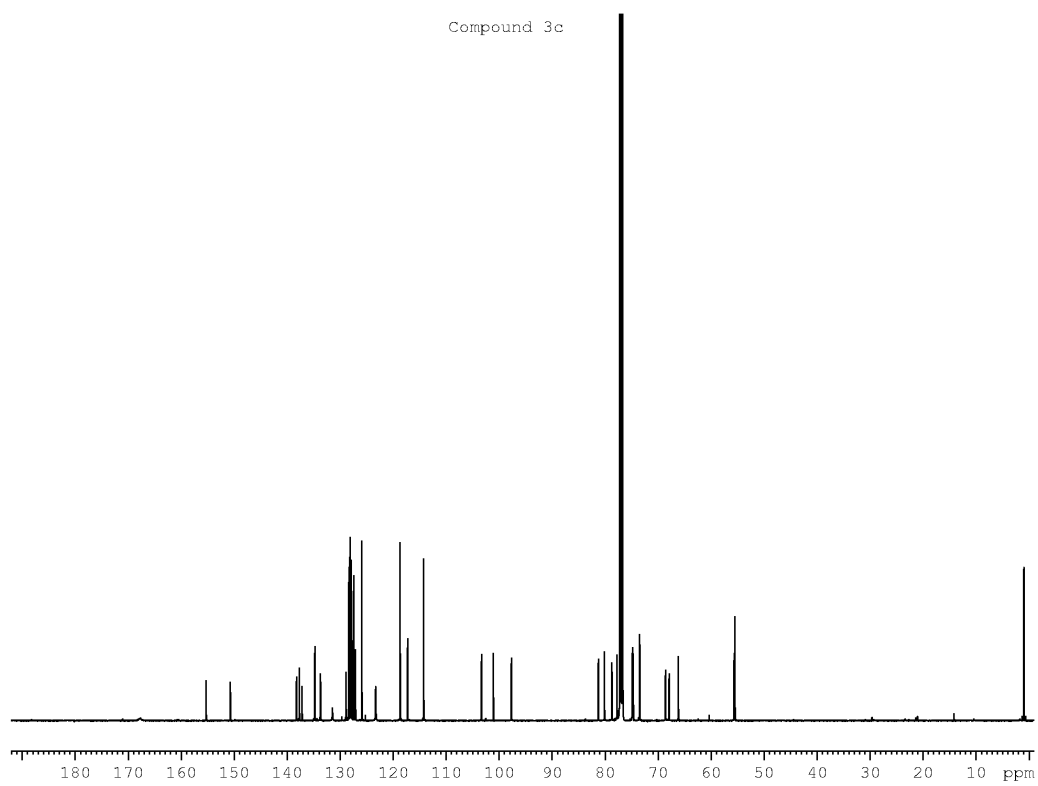

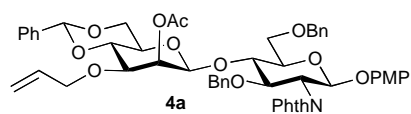

Compound 4a

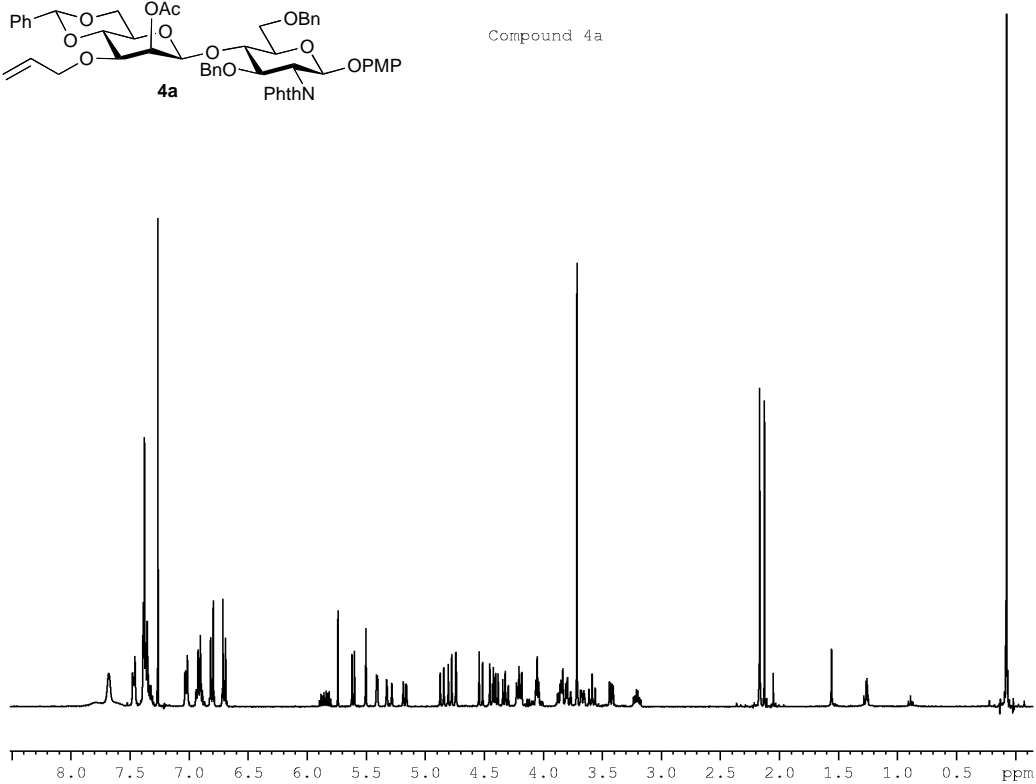

Compound 4a

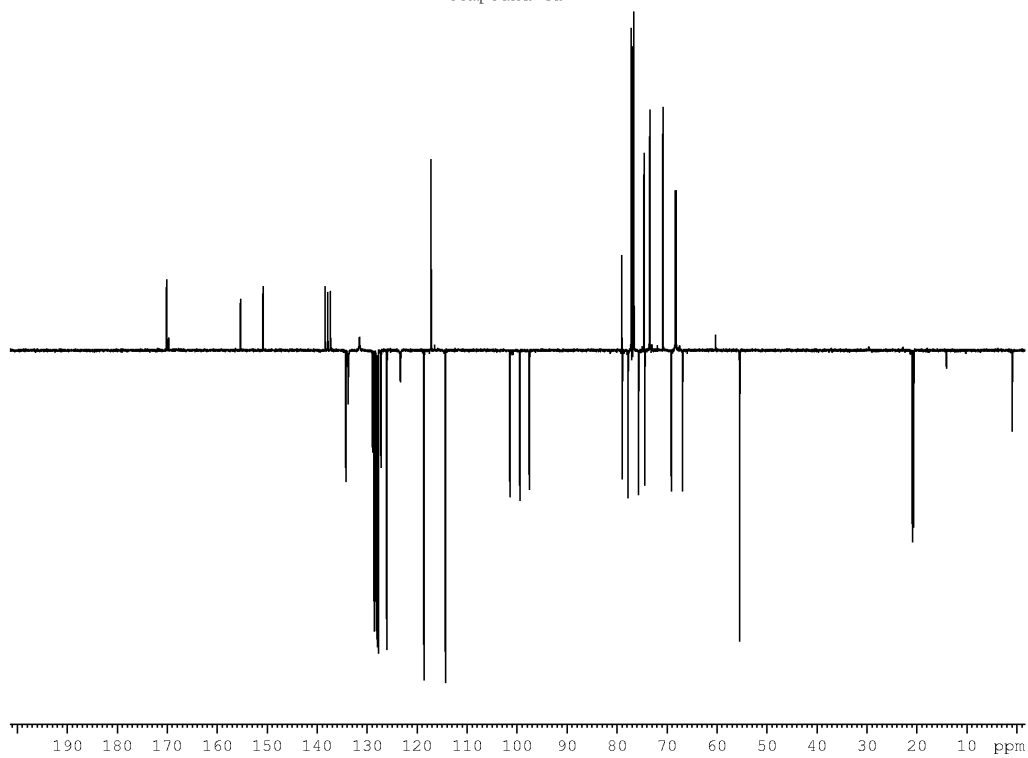

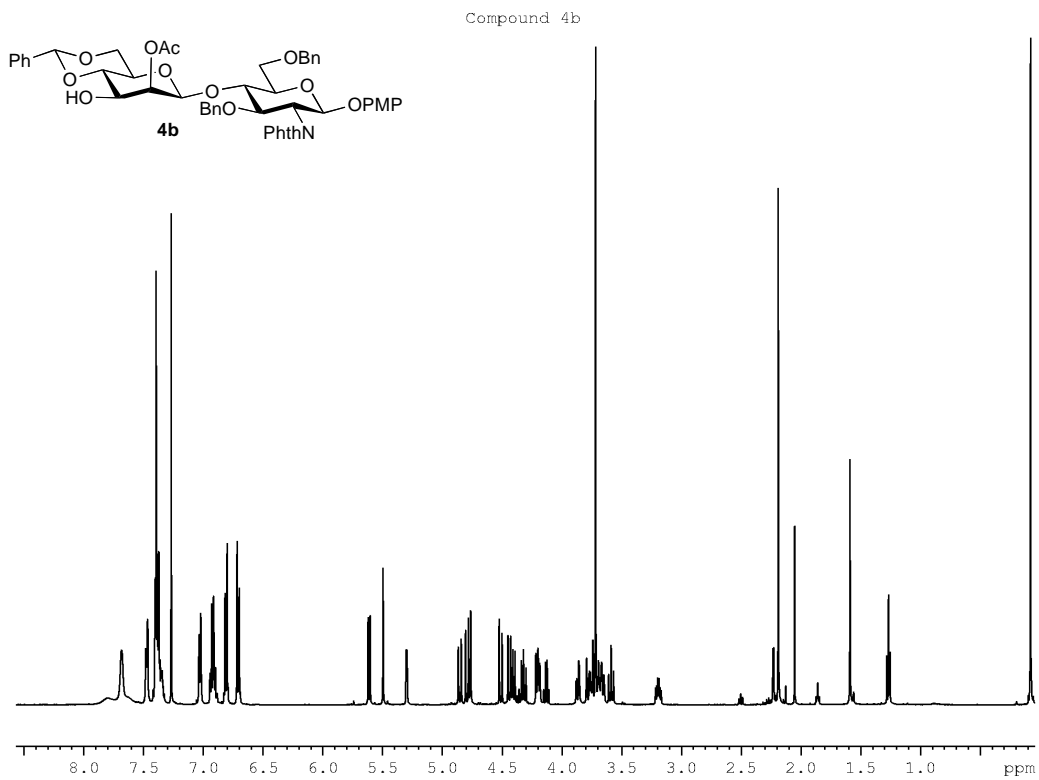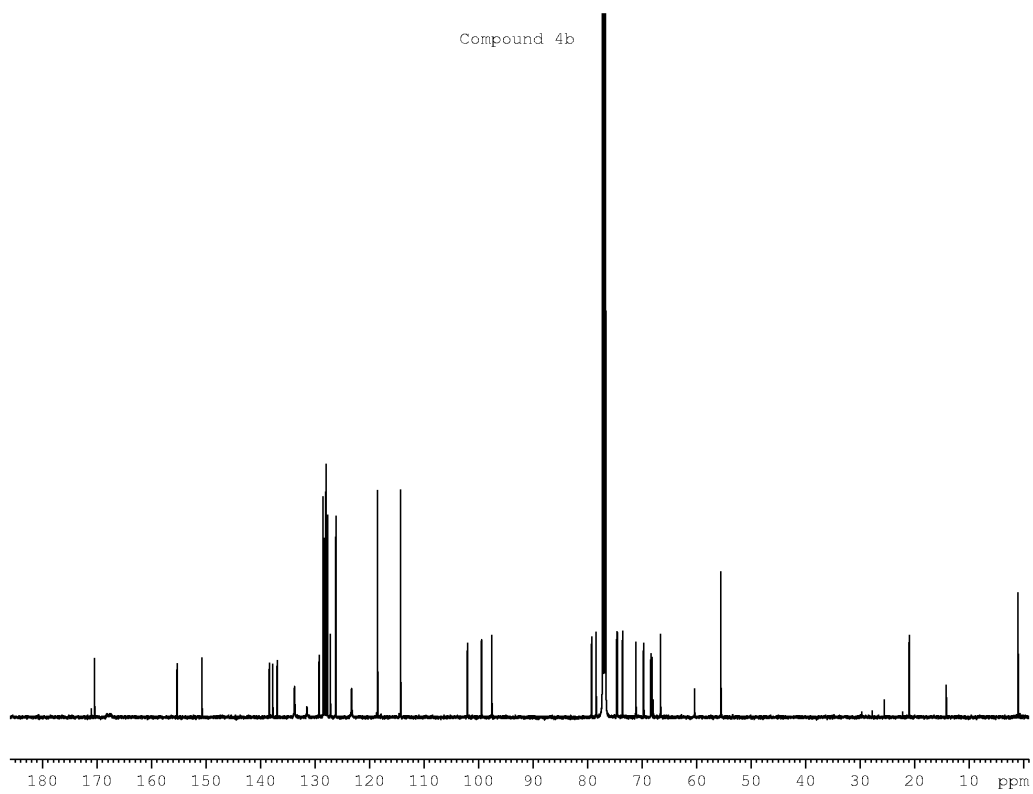

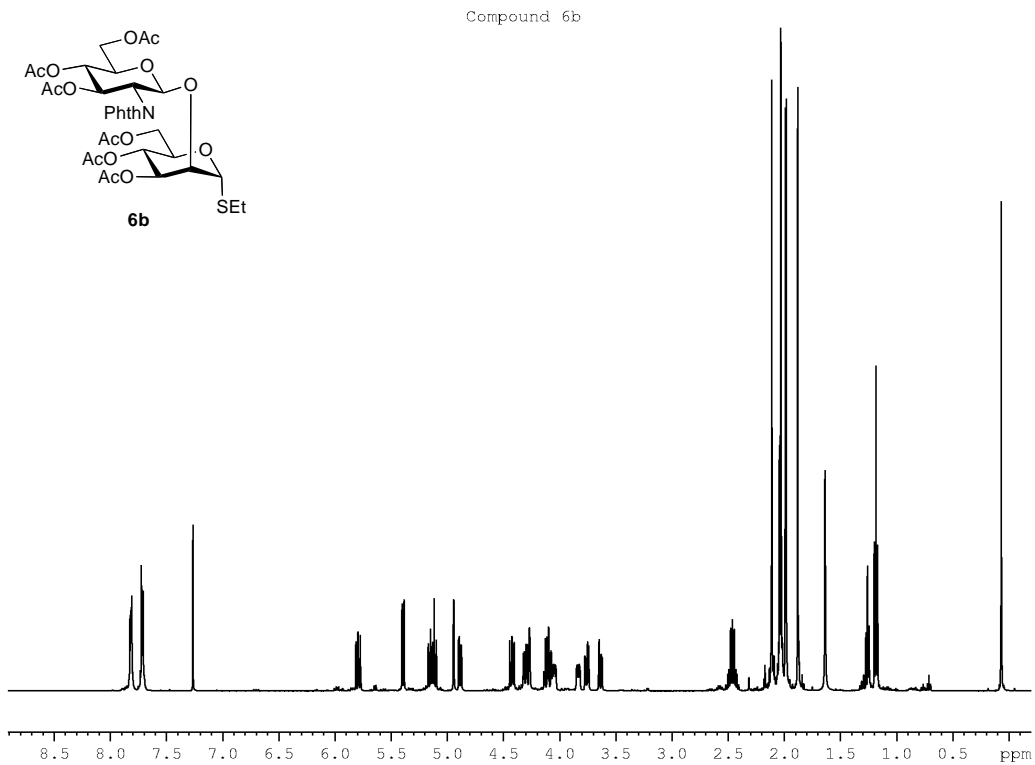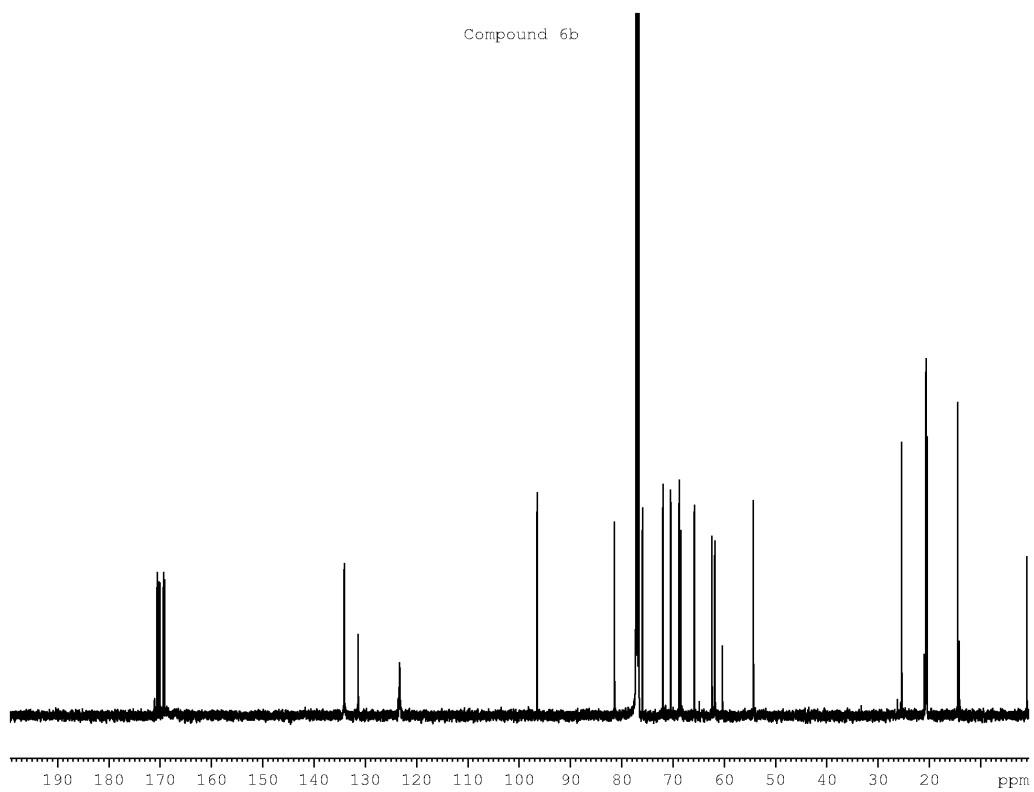

Compound 7

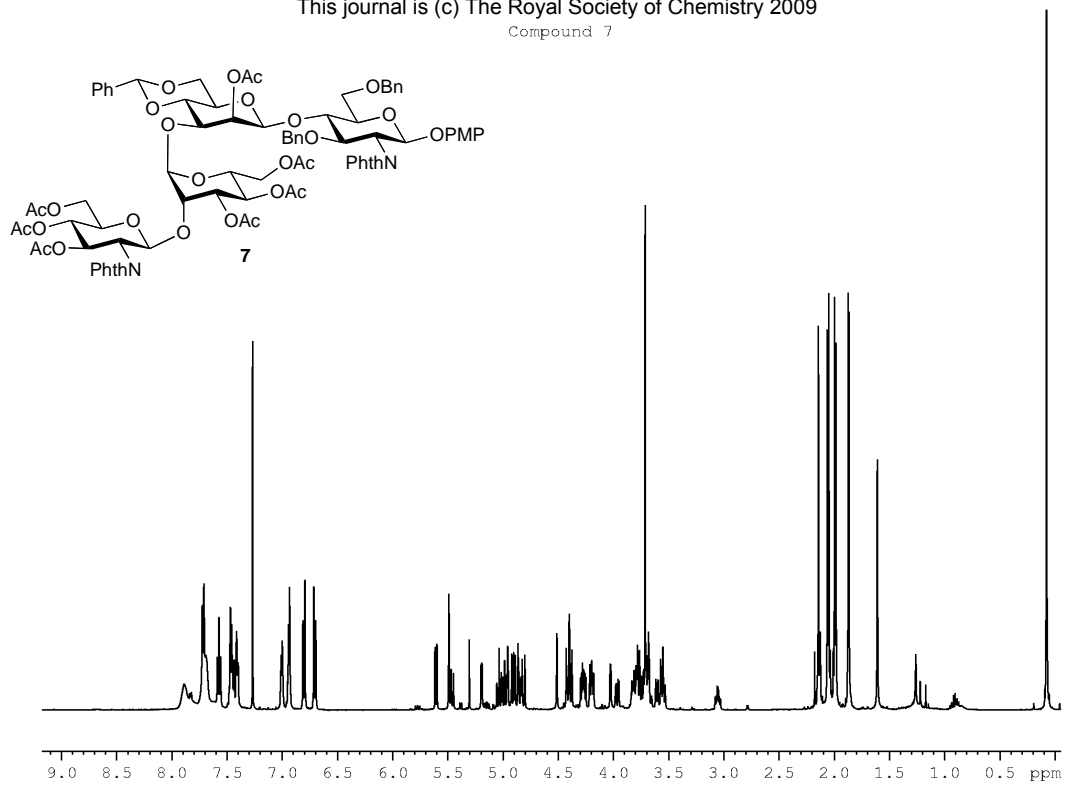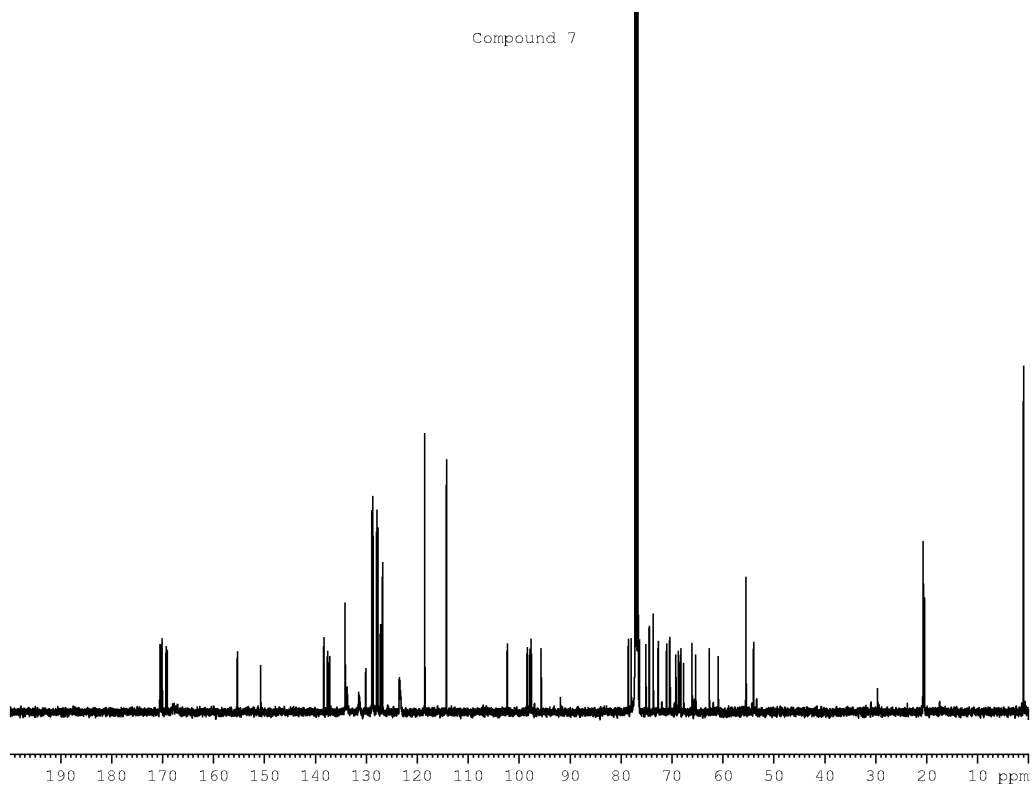

Compound 8

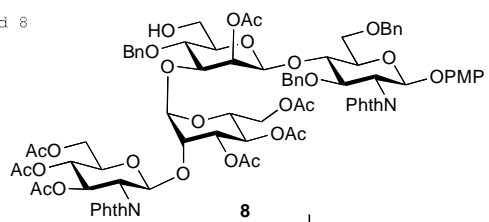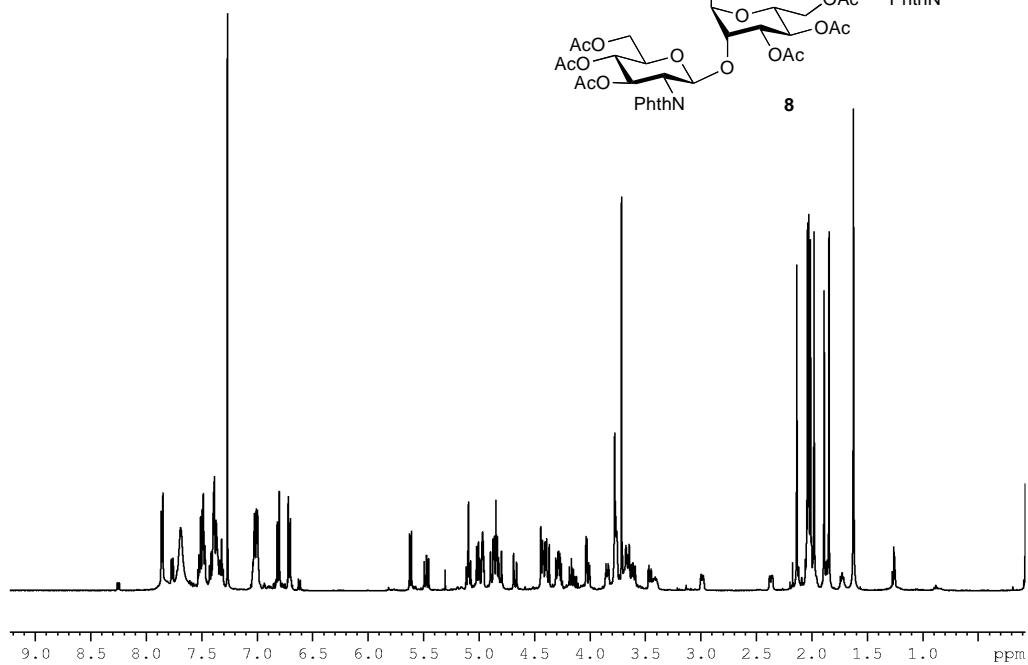

Compound 8

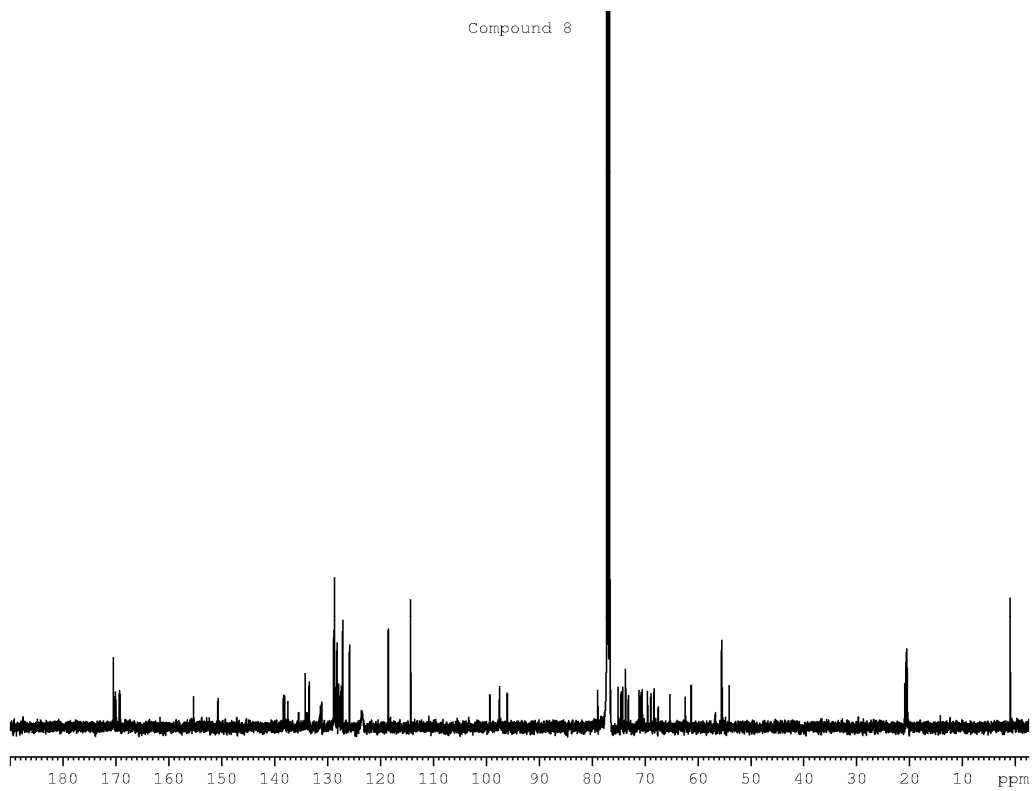

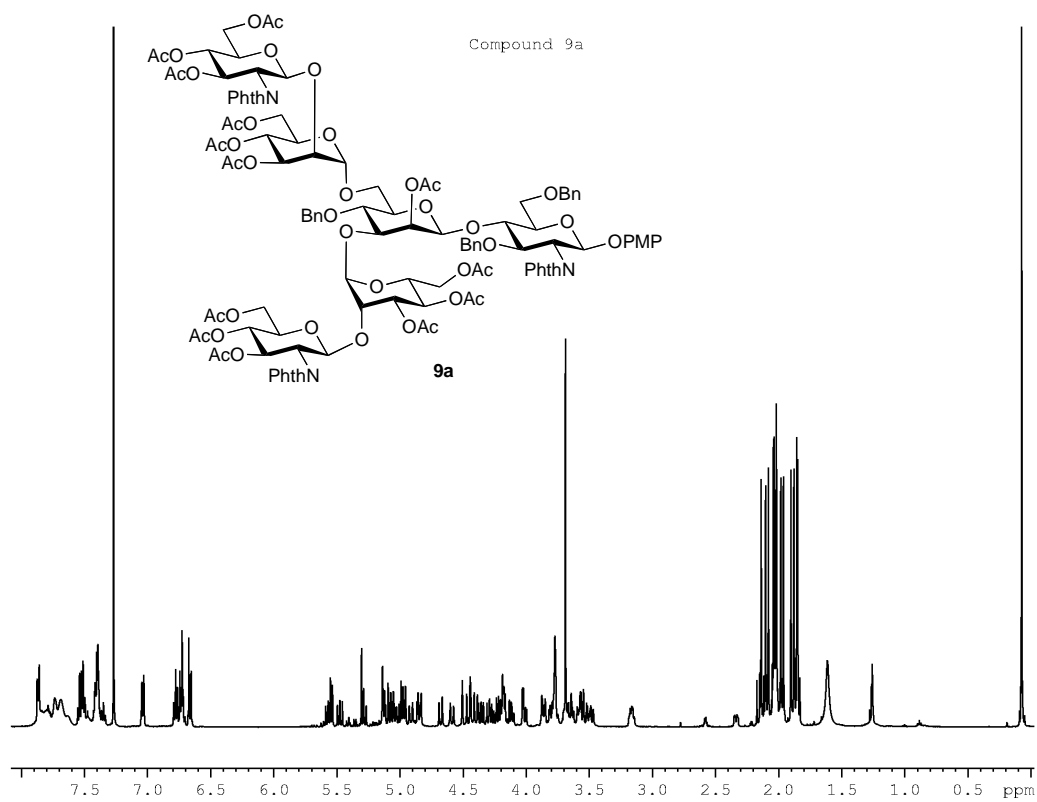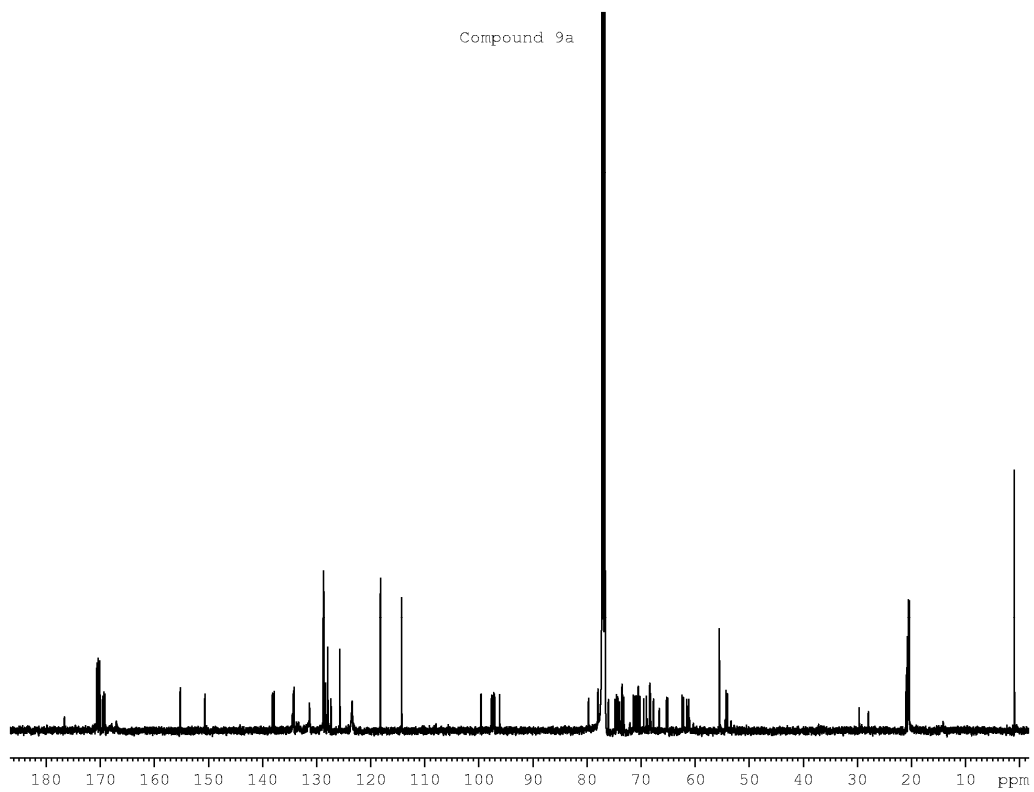

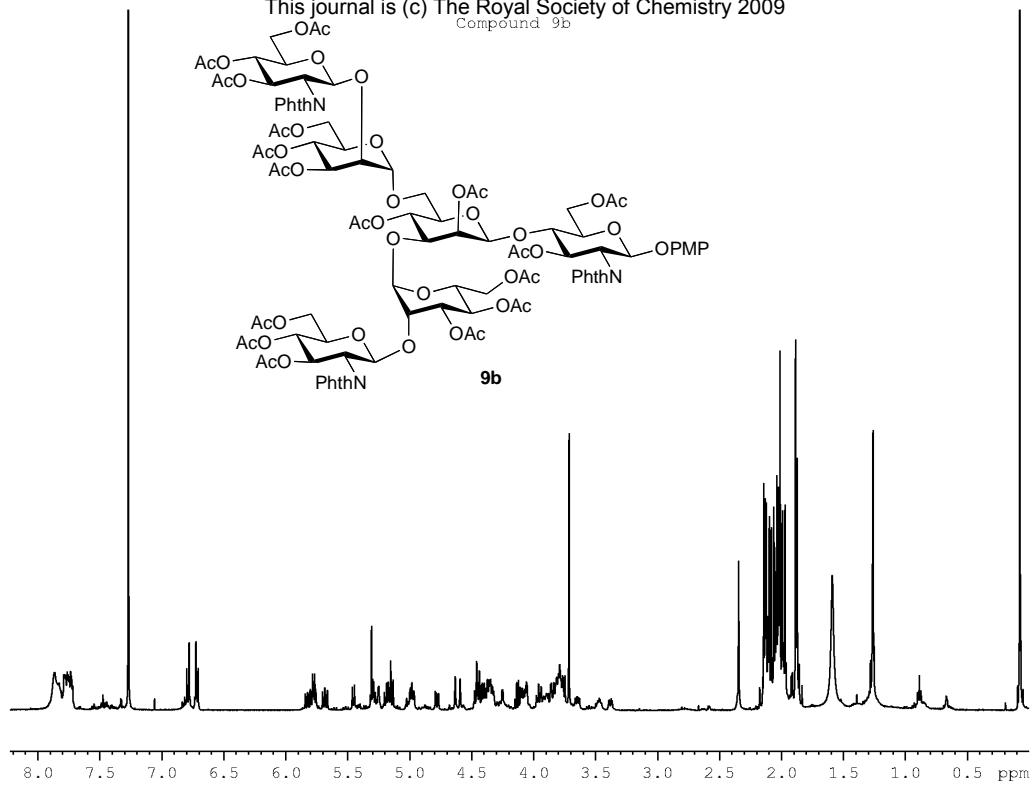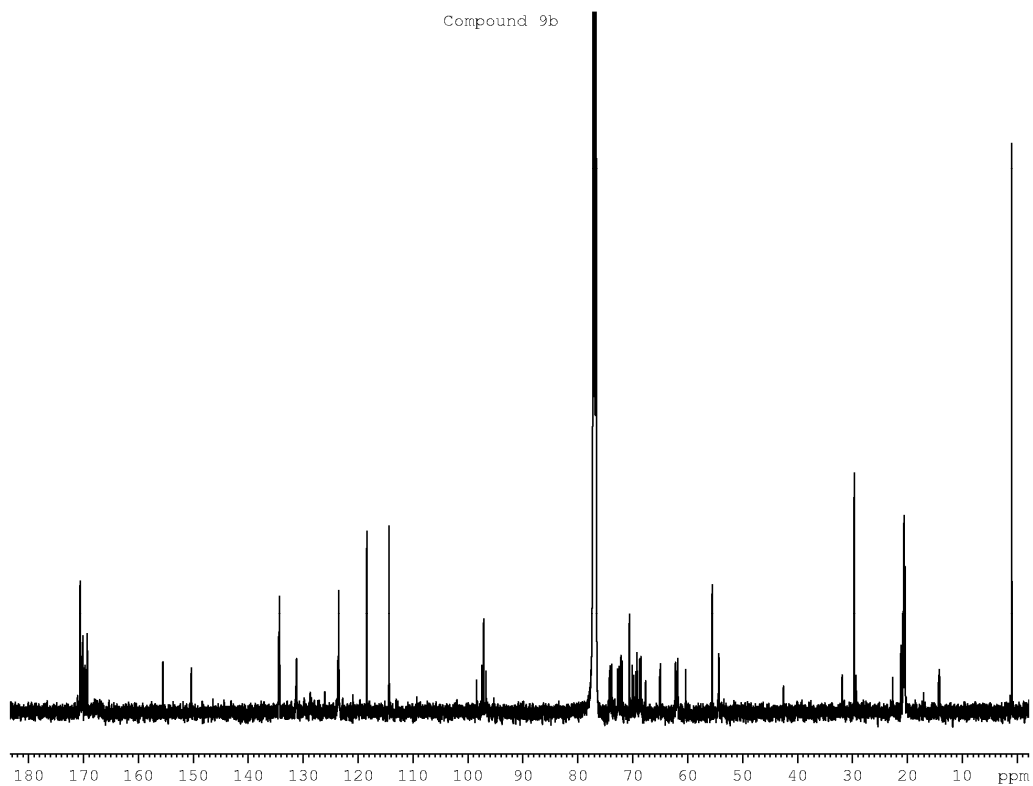

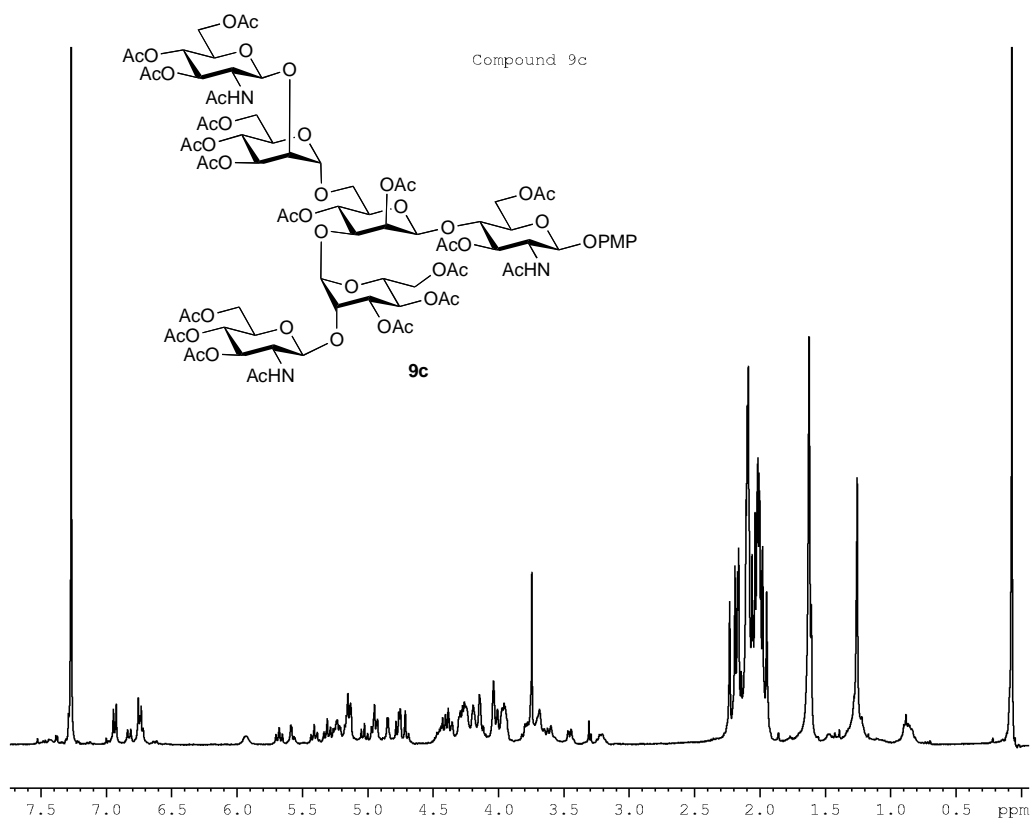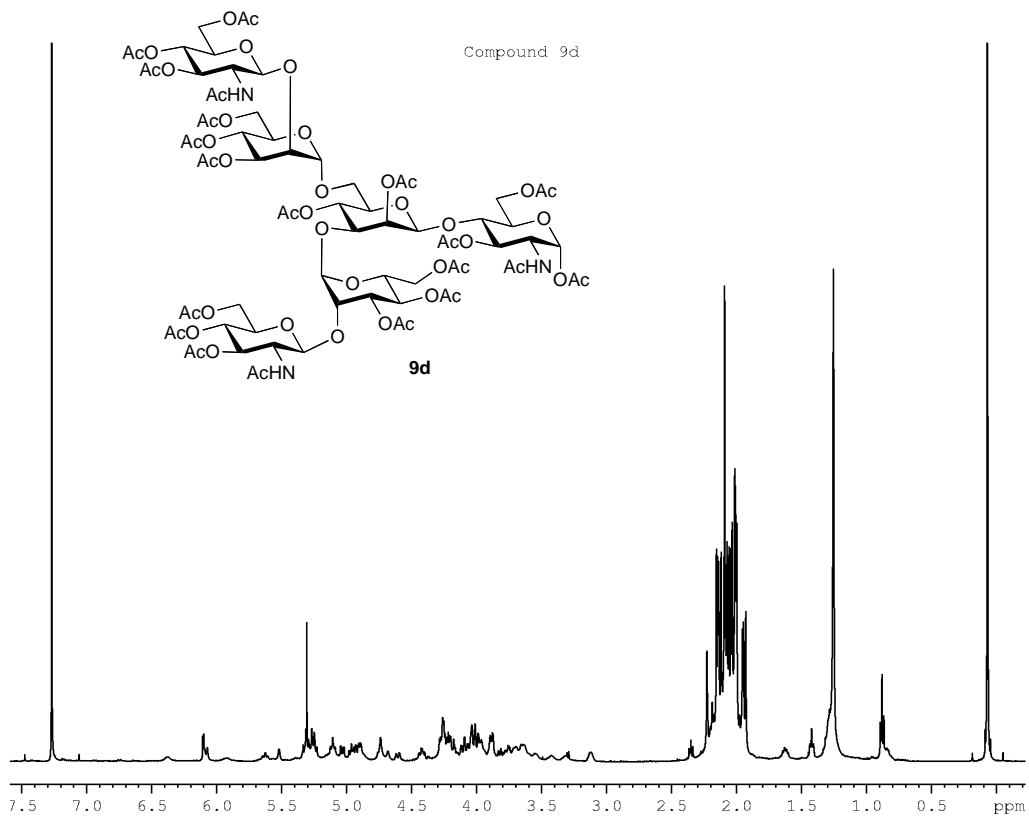

Compound 10

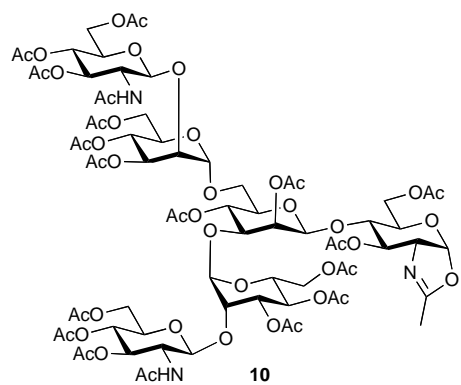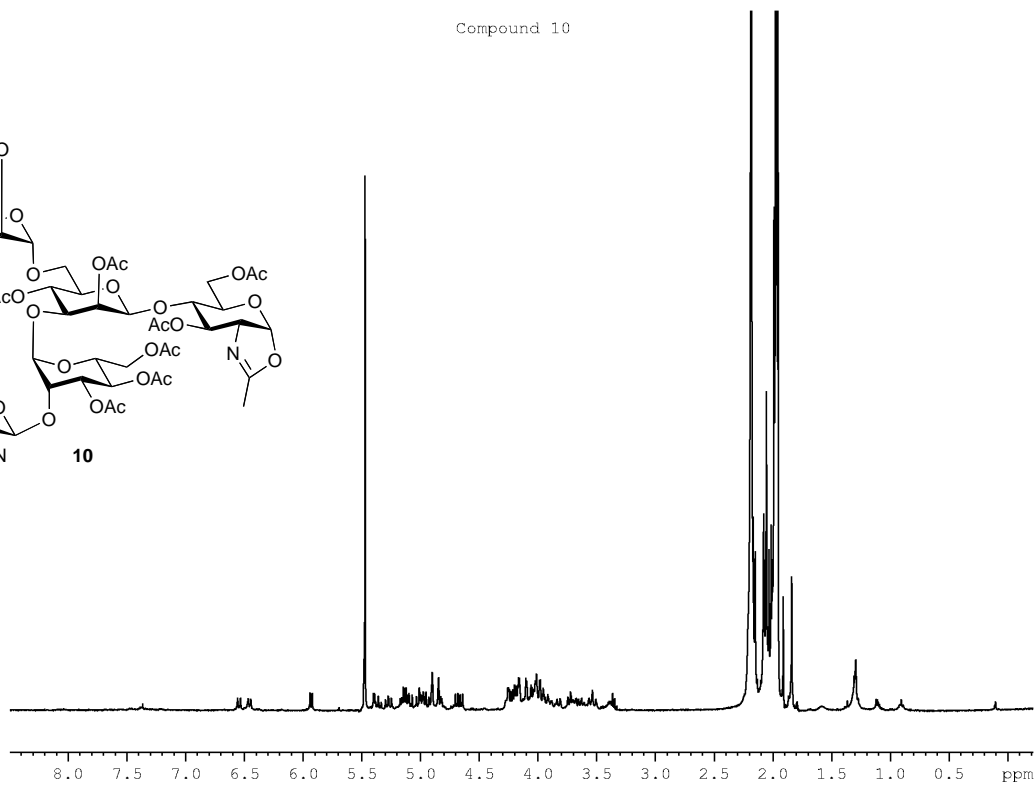

Compound 11

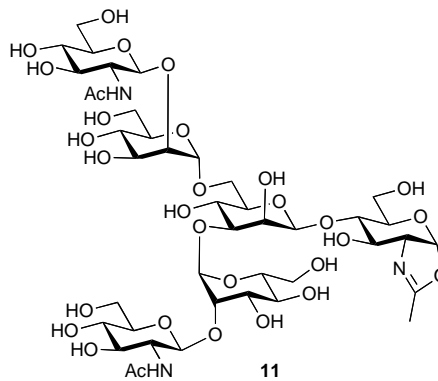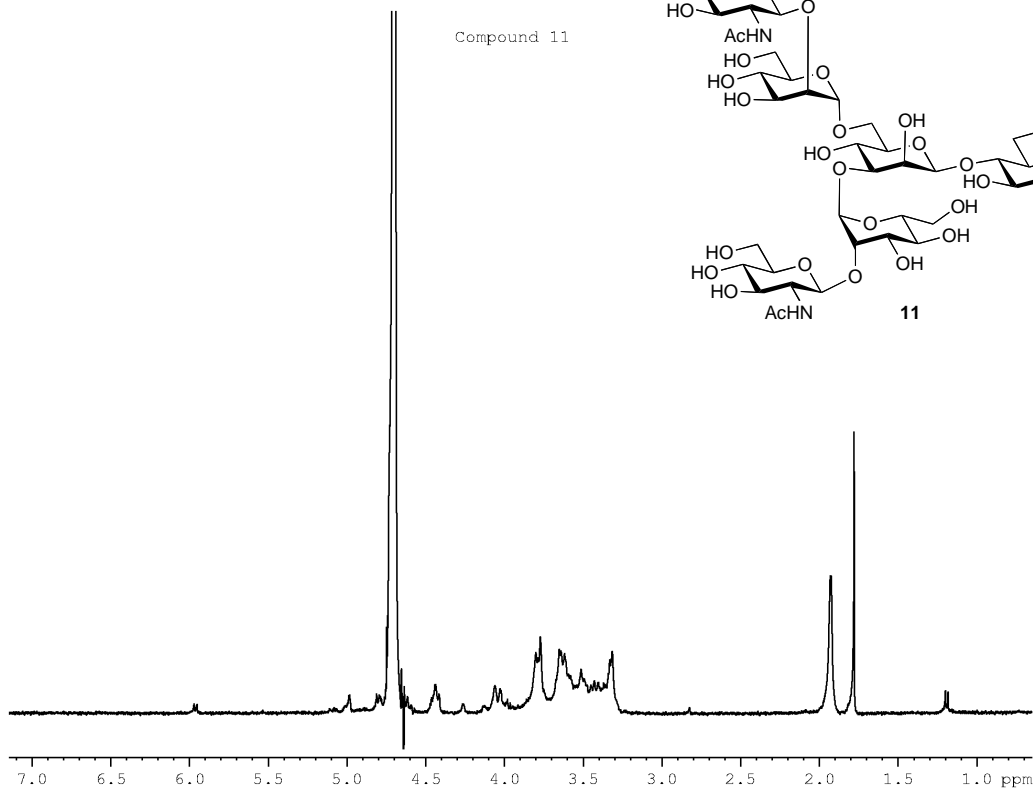

Compound 13

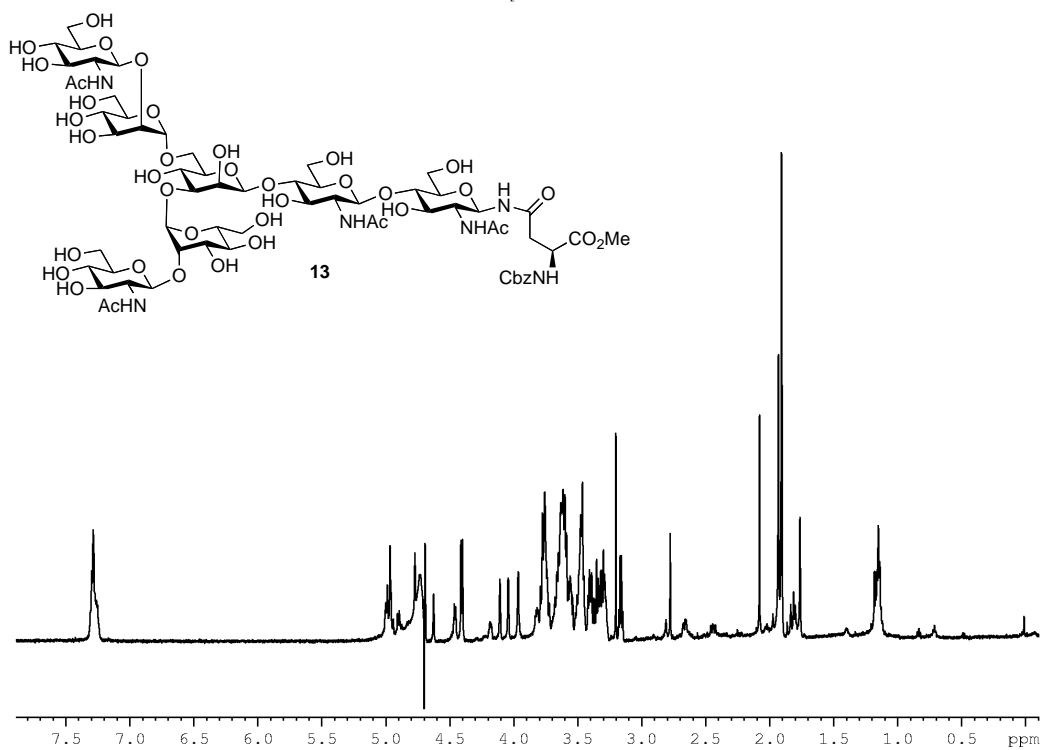

Supplement: b907273j.pdf [file b907273j.pdf]
